# Supplementary material for: Surface electron modulation of a plasmonic semiconductor for enhanced CO2 photoreduction
Source: Royal Society of Chemistry journal article supplement (doi:10.1039/d2ta08958k), 2023-01-01
Supplement: d2ta08958k1.pdf [file d2ta08958k1.pdf]

## Supporting information

### Surface electron modulation of plasmonic semiconductor for enhanced CO<sub>2</sub> photoreduction

Dehua Tian,<sup>a</sup> Changhai Lu,<sup>a</sup> Xiaowei Shi,<sup>c</sup> Haifeng Wu,<sup>a</sup> Lu Liu,<sup>a</sup> Wenjie Mai,<sup>b</sup> Baojun Li,<sup>a</sup>

Juan Li,<sup>a\*</sup> and Zaizhu Lou<sup>a,c\*</sup>

<sup>a</sup> Institute of Nanophotonics, Jinan University, Guangzhou, 511443, China

<sup>b</sup> Department of Physics, Jinan University, Guangzhou, 510632, China

<sup>c</sup> State Key Laboratory of Green Chemistry Synthesis Technology, Zhejiang University of Technology, Hangzhou, 310032, China

Corresponding author: [lijuan@jnu.edu.cn](mailto:lijuan@jnu.edu.cn), [zzlou@jnu.edu.cn](mailto:zzlou@jnu.edu.cn)

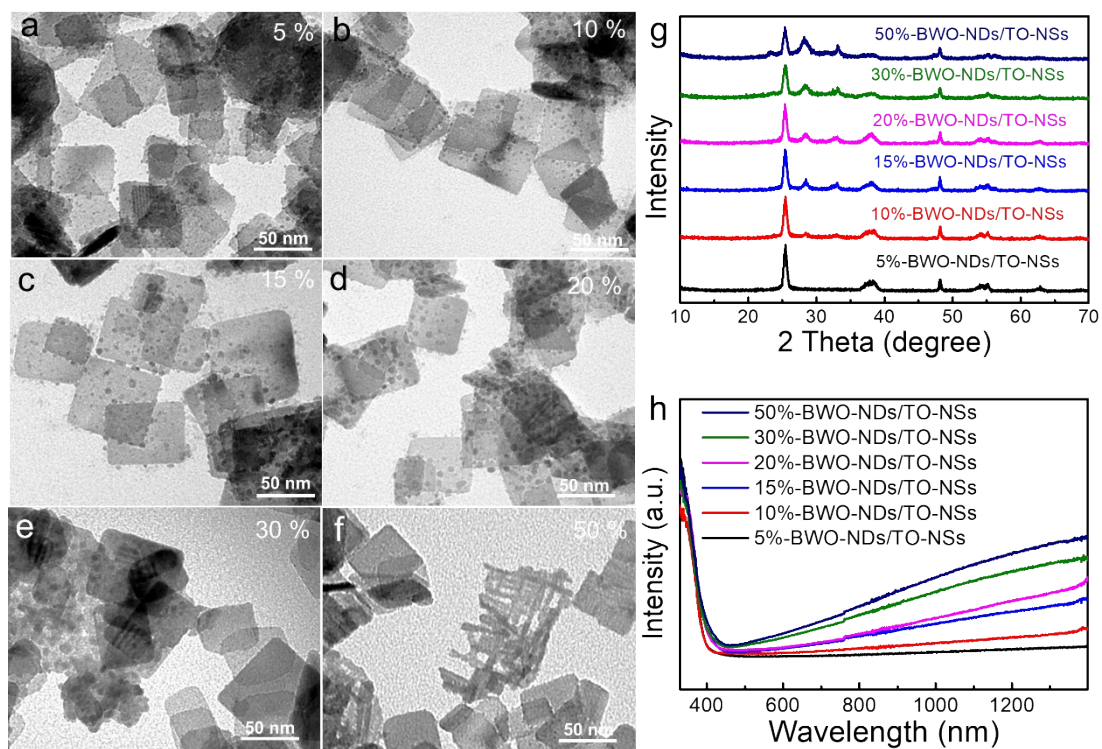

**Fig. S1.** TEM images of plasmonic heterostructure BWO-NDs/TO-NSs with different amount of Bi<sub>2</sub>WO<sub>6</sub>: 5 (a), 10 (b), 15 (c), 20 (d), 30 (e) and 50% (f), respectively. Their XRD patterns (g) and UV-vis-NIR DRS (h).

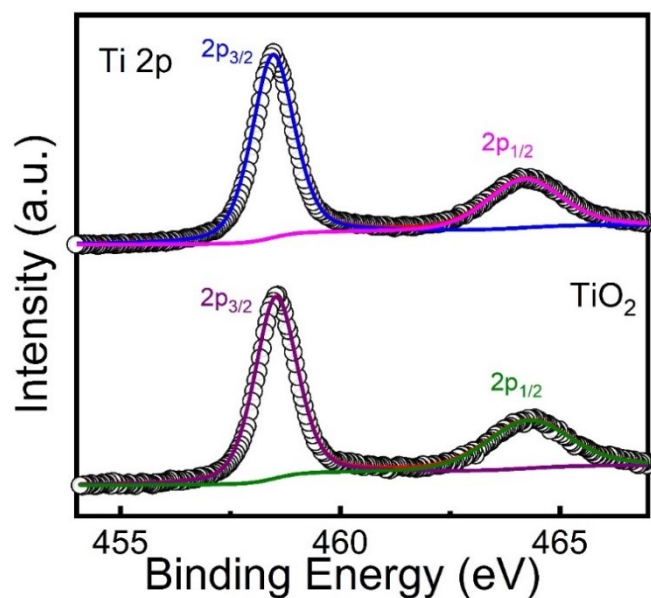

**Fig. S2.** Ti 2p XPS spectra on TiO<sub>2</sub> before and after light irradiation.

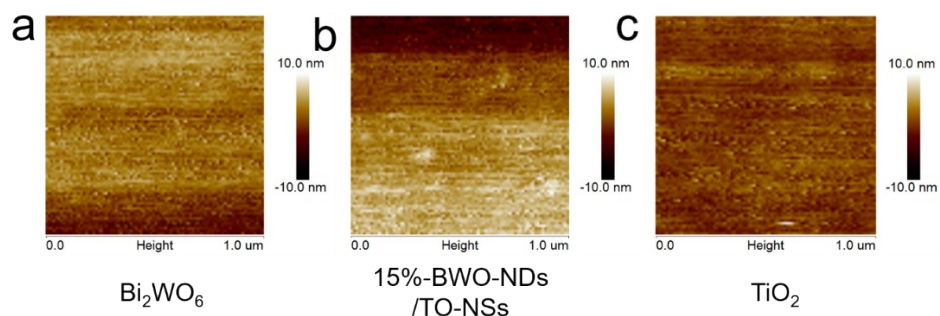

**Fig. S3.** The AFM images of plasmonic  $\text{Bi}_2\text{WO}_6$  films, 15%-BWO-NDs/TO-NSs film and  $\text{TiO}_2$  films.

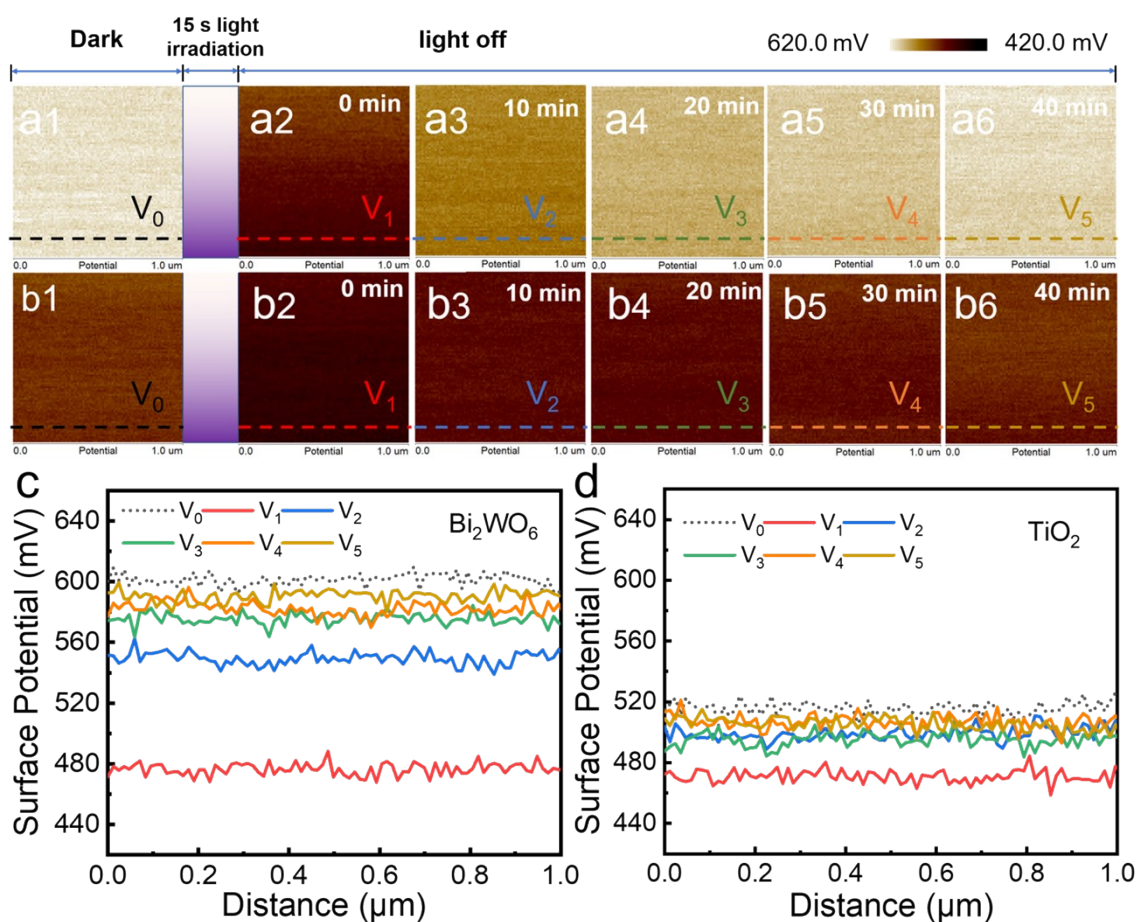

**Fig. S4.** The surface potential images of  $\text{Bi}_2\text{WO}_6$  before and after 15 s light irradiation with time (a1-a6), The surface potential images of  $\text{TiO}_2$  before and after 15 s light irradiation with time (b1-b6), Surface potentials (c,d) along the lines marked in (a,b).

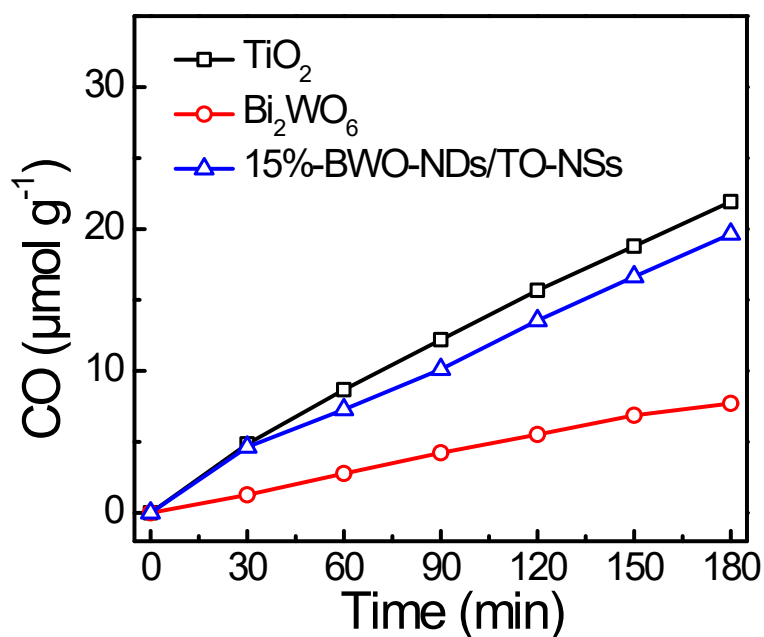

**Fig. S5.** CO generation over TiO<sub>2</sub>, Bi<sub>2</sub>WO<sub>6</sub>, and 15%-BWO-NDs/TO-NSs as photocatalysts during CO<sub>2</sub>-RR, respectively, under UV-visible light irradiation.

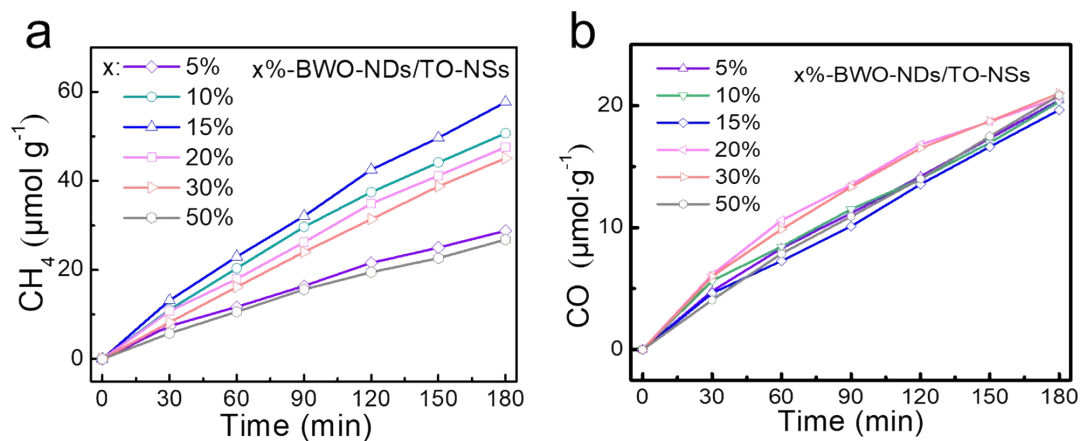

**Fig. S6.** CH<sub>4</sub> (a) and CO (b) generation over BWO-NDs/TO-NSs hybrids with 5, 10, 15, 20, 30 and 50 wt% Bi<sub>2</sub>WO<sub>6</sub> in composition, respectively. Light source, 300 W Xenon lamp, light density of 200 mW cm<sup>-2</sup>.

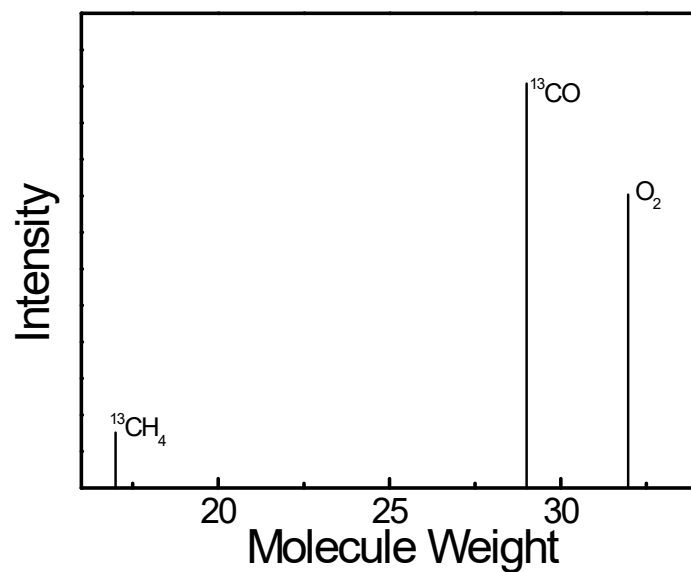

**Fig. S7.** Mass spectrometry (MS) spectra of products during  $\text{CO}_2$ -RR by using  $^{13}\text{C}$ -isotope labeled  $^{13}\text{CO}_2$  as reactants.

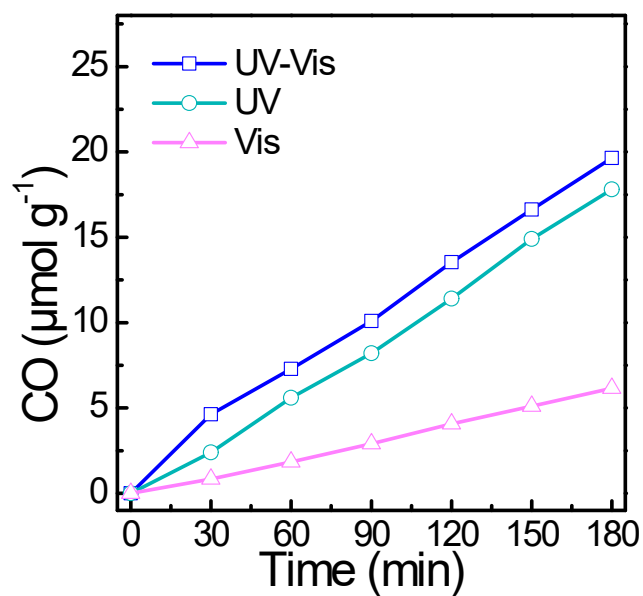

**Fig. S8.** CO generation rates over 15%-BWO-NDs/TO-NSs under visible (Vis,  $>420$  nm), UV and UV-visible (UV-Vis) light irradiation, respectively.

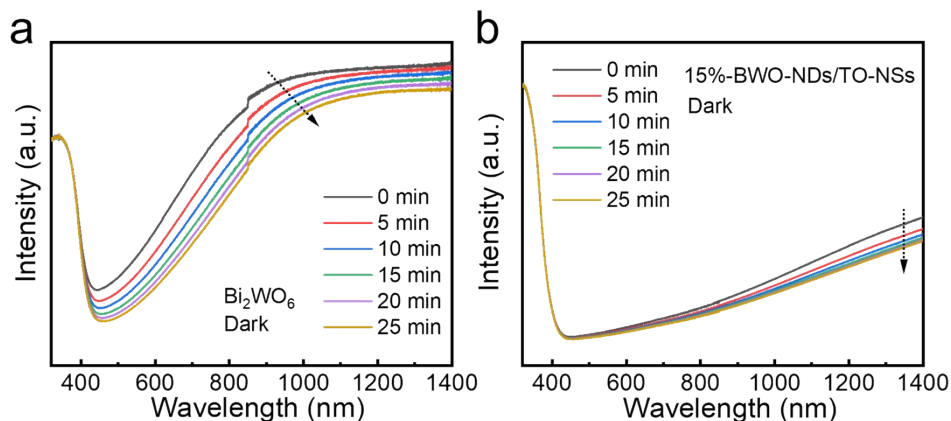

**Fig. S9.** UV-vis-NIR DRS changes of plasmonic  $\text{Bi}_2\text{WO}_6$  (a) and 15%-BWO-NDs/TO-NSs heterostructures (b) after stopping light irradiation.

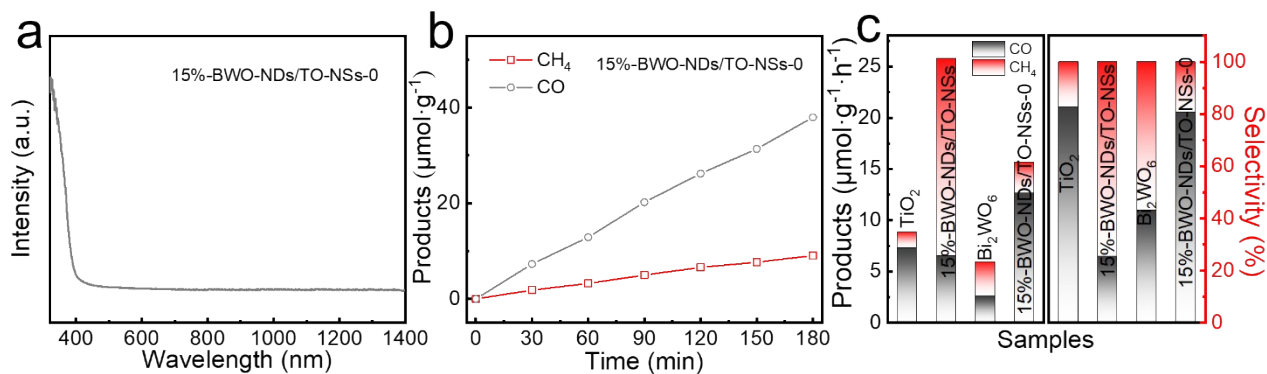

**Fig. S10.** DRS (a) of sample 15%-BWO-NDs/TO-NSs-0. Its products during  $\text{CO}_2$ -RR under UV-vis light irradiation (b). Products generation rates and selectivity (c) over o  $\text{TiO}_2$ ,  $\text{Bi}_2\text{WO}_6$ , 15%-BWO-NDs/TO-NSs and 15%-BWO-NDs/TO-NSs-0.

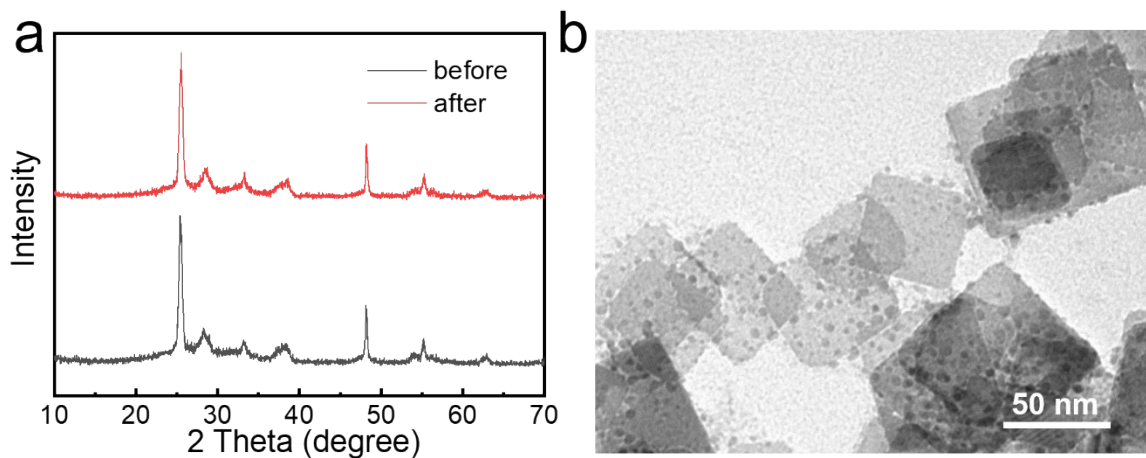

**Fig. S11.** XRD patterns (a) and TEM image (b) of 15%-BWO-NDs/TO-NSs samples after three photoreaction cycles.

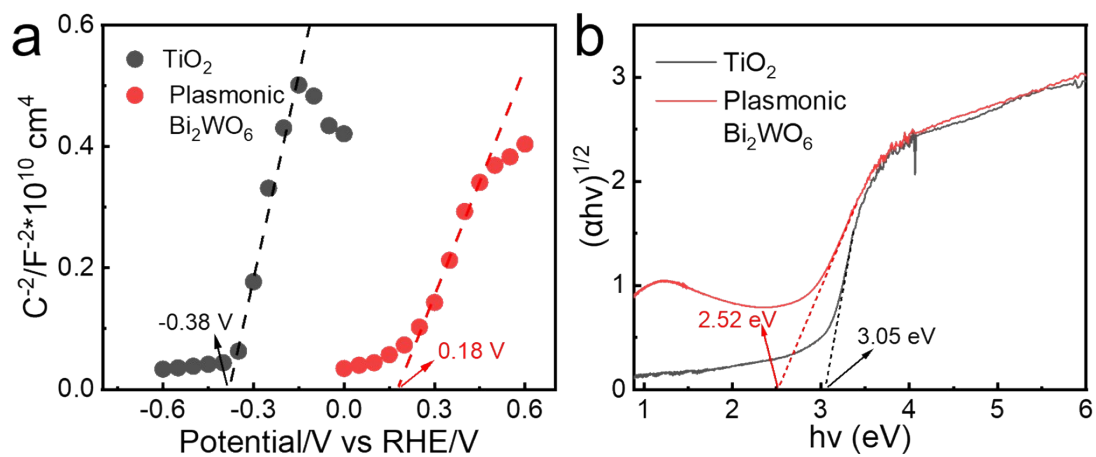

**Fig. S12.** Mott-Schottky plots (a) of TiO<sub>2</sub> and plasmonic Bi<sub>2</sub>WO<sub>6</sub> measured in a NaOH (1 M; pH 13.6) electrolyte at frequencies 100 Hz. Plots (b) of the transformed Kubelka–Munk functions vs the energy of light.



| Photocatalysts                                                  | Light source                                              | Reaction medium                                                  | Main products and highest yield                                                                 | Selectivity of CH <sub>4</sub> |
|-----------------------------------------------------------------|-----------------------------------------------------------|------------------------------------------------------------------|-------------------------------------------------------------------------------------------------|--------------------------------|
| Ti <sub>3</sub> C <sub>2</sub> /Bi <sub>2</sub> WO <sub>6</sub> | 300 W Xe-lamp                                             | Gas-solid, CO <sub>2</sub> /H <sub>2</sub> O vapor               | 1.78 (CH <sub>4</sub> )/ 0.44 (CH <sub>3</sub> OH) μmol g <sup>-1</sup> h <sup>-1</sup>         | 80.2% [1]                      |
| 20BWO/IVO                                                       | 300 W Xe-lamp (λ > 420 nm)                                | Liquid-solid water ( 5 mL H <sub>2</sub> O)                      | 1.13 (CH <sub>4</sub> )/ 17.97 (CO) μmol g <sup>-1</sup> h <sup>-1</sup>                        | 3.7% [2]                       |
| Bi <sub>2</sub> WO <sub>6</sub> -TiO <sub>2</sub>               | 300 W Xe-lamp (320 nm < λ < 780 nm)                       | Liquid-solid water ( 5 mL H <sub>2</sub> O)                      | 5.3 (CH <sub>4</sub> )/~6.3 (CO) μmol g <sup>-1</sup> h <sup>-1</sup>                           | 45.6 % [3]                     |
| Bi <sub>2</sub> WO <sub>6</sub> -OV/BiOI                        | 500 W Xe-lamp (λ > 400 nm)                                | Gas-solid, CO <sub>2</sub> /H <sub>2</sub> O vapor               | 2.29 (CH <sub>4</sub> ) / 40.02 (CO) μmol g <sup>-1</sup> h <sup>-1</sup>                       | 5.4 % [4]                      |
| 2D/2D CsPbBr <sub>3</sub> /Bi <sub>2</sub> WO <sub>6</sub>      | 150 W Xe lamp (AM 1.5G filter · 150 mW cm <sup>-2</sup> ) | Liquid-solid 8 ml EA, 2 ml IPA                                   | 14.33 (CH <sub>4</sub> ) / 9.38 (CO)/1.82(H <sub>2</sub> ) μmol g <sup>-1</sup> h <sup>-1</sup> | 56.1% [5]                      |
| Ultrathin ZnPc/BiVO <sub>4</sub> nanosheet                      | 300 W Xe lamp (420 nm cut-off filter)                     | CO <sub>2</sub> /H <sub>2</sub> O vapor                          | 0.15 (CH <sub>4</sub> ) / 0.97 (CO) μmol g <sup>-1</sup> h <sup>-1</sup>                        | 13.4% [6]                      |
| Bi <sub>2</sub> MoO <sub>6</sub> -OVs                           | 300 W Xe lamp (λ > 420 nm)                                | Gas-solid, CO <sub>2</sub> /H <sub>2</sub> O vapor               | 2.10 (CH <sub>4</sub> ) / 0.27 (CO) μmol g <sup>-1</sup> h <sup>-1</sup>                        | 88.6% [7]                      |
| Bi <sub>2</sub> WO <sub>6</sub> nanosheets                      | 300 W Xe lamp (AM 1.5G filter)                            | CO <sub>2</sub> /H <sub>2</sub> O vapor                          | 0.63 (CH <sub>4</sub> ) / 7.12 (CO)/4.6 (O <sub>2</sub> ) μmol g <sup>-1</sup> h <sup>-1</sup>  | 5.1% [8]                       |
| TiO <sub>2</sub> @PDA                                           | 350 W Xe lamp (AM 1.5G filter)                            | Liquid-solid, water (2 ml H <sub>2</sub> O)                      | 1.5 (CH <sub>4</sub> )/0.26 (CH <sub>3</sub> OH) μmol g <sup>-1</sup> h <sup>-1</sup>           | 85% [9]                        |
| Au-TiO <sub>2</sub> (O)                                         | 300 W Xe lamp (420 nm < λ < 780 )                         | Liquid-solid, water (CO <sub>2</sub> /H <sub>2</sub> O solution) | 0.2 (CH <sub>4</sub> ) / 1.2 (CO) μmol g <sup>-1</sup> h <sup>-1</sup>                          | 14.3 % [10]                    |
| This work                                                       | 300 W Xe lamp (420 nm < λ < 780)                          | Gas-solid, CO <sub>2</sub> /H <sub>2</sub> O vapor               | 19.2 (CH <sub>4</sub> )/6.6 (CO) μmol g <sup>-1</sup> h <sup>-1</sup>                           | 75%                            |

**Table S1** Photocatalytic CO<sub>2</sub> reduction performance of 15%-BWO-NDs/TO-NSs compared to other up-to-date catalysts.



## References

1. S. Cao, B. Shen, T. Tong, J. Fu, J. Yu, 2D/2D Heterojunction of Ultrathin MXene/Bi<sub>2</sub>WO<sub>6</sub> Nanosheets for Improved Photocatalytic CO<sub>2</sub> Reduction, *Adv. Funct. Mater.* 2018, **28**, 1800136.
2. J. Li, F. Wei, Z. Xiu and X. Han, *Chem. Eng. J.*, 2022, **446**, 137129.
3. L. Yuan, K. Q. Lu, F. Zhang, X. Fu and Y. J. Xu, *Appl. Catal. B-Environ.*, 2018, **237**, 424-431.
4. X. Y. Kong, W. Q. Lee, A. R. Mohamed and S. P. Chai, *Chem. Eng. J.*, 2019, **372**, 1183-1193.
5. Y. Jiang, H. Y. Chen, J. Y. Li, J. F. Liao, H. H. Zhang, X. D. Wang and D. B. Kuang, *Adv. Funct. Mater.*, 2020, **30**, 2004293.
6. J. Bian, J. Feng, Z. Zhang, Z. Li, Y. Zhang, Y. Liu, S. Ali, Y. Qu, L. Bai, J. Xie, D. Tang, X. Li, F. Bai, J. Tang and L. Jing, *Angew. Chem. Int. Ed.*, 2019, **131**, 10989-10994.
7. X. Yang, S. Wang, N. Yang, W. Zhou, P. Wang, K. Jiang, S. Li, H. Song, X. Ding, H. Chen and J. Ye, *Appl. Catal. B-Environ.*, 2019, **259** 118088.
8. Y. Liu, D. Shen, Q. Zhang, Y. Lin and F. Peng, *Appl. Catal. B-Environ.*, 2021, **283**, 119630.
9. A. Meng, B. Cheng, H. Tan, J. Fan, C. Su and J. Yu, *Appl. Catal. B-Environ.*, 2021, **289**, 120039.
10. A. Wang, S. Wu, J. Dong, R. Wang, J. Wang, J. Zhang, S. Zhong and S. Bai, *Chem. Eng. J.*, 2021, **404**, 127145.
